## RESEARCH ARTICLE

# Bilateral auditory processing studied by selective cold-deactivation of cricket hearing organs

Xinyang Zhang and Berthold Hedwig\*

## ABSTRACT

We studied bilateral processing in the auditory ON neurons of crickets using reversible cold-deactivation of the hearing organs by means of Peltier elements. Intracellular recordings of the neurons' activity in response to acoustic stimuli were obtained, while either the ipsilateral or the contralateral hearing organ was cold-deactivated. Afferent activity was abolished at a temperature of approximately 10°C. In ON1, contralateral inhibition had no effect on the latency and amplitude of the phasic onset activity, it enhanced the decline of the onset activity and it decreased the subsequent tonic spiking response to acoustic stimuli. As a consequence, the phasic onset activity became more salient and reciprocal inhibition may support the detection of sound pulses. Contralateral inhibition had a significant impact on the tonic ON1 response, in line with its presumed function to enhance the bilateral auditory contrast. In ON2, experiments confirmed a bilateral excitatory input, with the ipsilateral input dominating the response, and no inhibitory coupling between the ON2 neurons.

**KEY WORDS:** Peltier element, Chill coma, Reciprocal inhibition, Omega neurons

## INTRODUCTION

For the analysis of bilateral auditory processing, insects such as crickets and bush-crickets are favourable systems (Lewis, 1983). Their hearing organs are positioned in the front legs, and are coupled via an auditory trachea (Michelsen et al., 1994; Schmidt and Römer, 2013), while auditory afferents terminate in the first thoracic ganglion (Esch et al., 1980), where they synapse to auditory interneurons (Popov et al., 1978; Wohlers and Huber, 1978, 1982; Hedwig and Stumpner, 2016). These neurons provide the first stage of bilateral auditory processing, a crucial step for sound localization, which is based on the difference in left–right auditory activity. While recording the responses of central auditory neurons, both hearing organs may be stimulated at the same time, but the particular organization of the auditory system in these insects also allows the selective stimulation of one hearing organ at a time, i.e. to decouple the activation of the left and right ear and to compare the central responses. In crickets, bilateral auditory processing has been studied using decoupled stimulation of the hearing organs with miniature phones attached to the legs, while the central auditory trachea was severed (Kleindienst et al., 1981; Wohlers and Huber, 1982; Horseman and Huber, 1994a,b). Such an interference with the auditory system is not reversible, and as the auditory trachea is damaged, it may also alter the function of the pressure difference receiver.

Neural activity, however, is highly temperature dependent, a fact that in insects has been successfully used to study behaviour and neural processing (Farley et al., 1967; Matthews and White, 2013). Cooling an insect leads to the loss of motor coordination at the critical thermal minimum and finally abolishes spike initiation and conduction in the nervous system when entering the chill coma (Overgaard and MacMillan, 2017; French and Kuster, 1982; French, 1985). In bush-crickets and crickets, the exposed position of the hearing organ in the front tibia enables selective cooling and blocking of the activity of auditory afferents without affecting the activity of the CNS (Baden and Hedwig, 2010). We further developed and refined this technique in order to analyse the dynamics of bilateral auditory processing in cricket ON neurons. We measured and compared their auditory responses under normal conditions and when one of the hearing organs was transiently deactivated by cooling. Two types of local omega-shaped neurons (ON1 and ON2) form bilateral mirror-image pairs. Each ON1 receives excitatory inputs from the auditory afferents ipsilateral to its dendrites, and each ON1 neuron forwards inhibition to its contralateral sibling, so that both ON1 neurons are coupled by reciprocal inhibition (Selverston et al., 1985). This local inhibitory circuit formed by the ON1 neurons is believed to enhance the bilateral auditory contrast and to support sound localization (Wohlers and Huber, 1978, 1982; Kleindienst et al., 1981). The ON1 network has also been suggested to contribute to auditory pattern recognition (Wiese and Eilts, 1985; Wiese and Eilts-Grimm, 1985) and may support the detection of species-specific sound pulses (Reeve and Webb, 2003; Hedwig, 2016). The ON2 neuron has dendritic arborisations in both halves of the ganglion while its function is not yet clear.

## MATERIALS AND METHODS

### Experimental animals

Adult female crickets (*Gryllus bimaculatus* DeGeer 1773) from a colony at the Department of Zoology, University of Cambridge, were used 10–25 days after final ecdysis and were checked for physical integrity of their tympanic membranes. Experiments were performed at 24°C (room temperature).

### Peltier elements for cold-deactivation of hearing organs

Two 10×10 mm Peltier elements (Peltron, Fürth, Germany) were used to control the temperature of the front tibiae and inactivate the ears. The Peltier devices were placed on both sides of the cricket at a tilted angle of 45 deg. Crickets were briefly sedated in a refrigerator at 8°C and were subsequently mounted ventral side up on the centre of a platform covered by Plasticine, avoiding electrical conduction between the animal and the Peltier devices. The front tarsi and tip of the tibiae were attached with Blu Tack to the cooled surface of the elements; the heated side was attached to an 80×80×50 mm aluminium block acting as an effective heatsink (Fig. 1A,B). Thermocouples (K-PTFE thermocouples, RS components, Corby, Northants, UK) were calibrated in water baths of 0°C and 20°C and attached to the cooled surface of the Peltier elements to monitor the surface temperature with

Department of Zoology, University of Cambridge, Cambridge CB2 3EJ, UK.

\*Author for correspondence (bh202@cam.ac.uk)

 B.H., 0000-0002-1132-0056

Received 17 July 2019; Accepted 27 September 2019

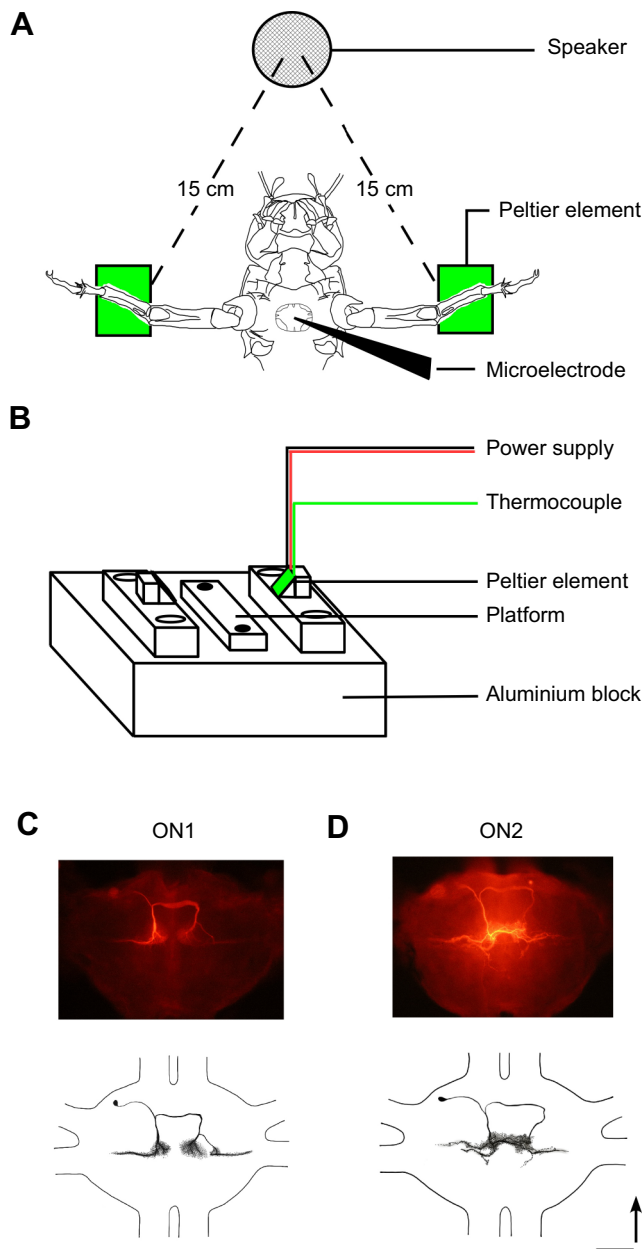

**Fig. 1. Experimental set-up for cooling hearing organs and intracellular recordings of central neurons.** (A) The cricket's front legs are tethered to Peltier elements, the prothoracic ganglion is exposed for intracellular recordings, and a loudspeaker is placed in front of the animal for acoustic stimulation. (B) Details of experimental device with the platform to mount the cricket, the arrangement of the Peltier elements and the thermocouples, and the aluminium block serving as heat sink. (C,D) Structure of ON1 and ON2, respectively, reconstructed from image stacks after labelling with Alexa 568. Scale bar is 100  $\mu\text{m}$ , arrow indicates anterior.

an accuracy of 0.5–1.0°C by a custom-built circuit. To evaluate whether cooling of one Peltier device affected the temperature of the other one, we recorded the temperature of both Peltier devices simultaneously. When the surface of one element was cooled to 8–10°C, the opposite thermocouple did not indicate a change in temperature of the non-activated Peltier device (see Fig. 2, inset).

#### Acoustic stimulation

Sound pulses of 150 ms duration, 250 ms inter-pulse intervals, a carrier frequency of 4.8 kHz, and an intensity of 75 dB SPL re. 20  $\mu\text{Pa}$

were used. The rising and falling ramps for each pulse were 2 ms. Stimuli were designed with audio software (Cool Edit 2000, Syntrillium, Phoenix, AZ, USA) and were presented by a loudspeaker (Sinus live NEO 13 s, Conrad Electronics, Hirschau, Germany) placed in front of the specimen at a distance of 15 cm from each tympanic membrane (Fig. 1A). Intensity was calibrated at the location of the cricket using a measuring amplifier and a 1/2 inch free field microphone (models 2610 and 4939, respectively; Brüel & Kjær, Nærum, Denmark).

#### Intracellular recordings

The prothoracic ganglion was exposed (Fig. 1A), the trachea supplying the ganglion and the auditory trachea connecting the left and right ear were left intact, and the mid and hind legs and the gut were removed. The ganglion was covered with insect saline (composition in  $\text{mmol l}^{-1}$ : NaCl 140; KCl 10;  $\text{CaCl}_2$  7;  $\text{NaHCO}_3$  8;  $\text{MgCl}_2$  1; TES 5; D-trehalose dehydrate 4, adjusted to pH 7.4). A stainless steel platform with an optic fibre embedded was placed under the dorsal side of the ganglion for support and illumination; the platform also served as the reference electrode. To increase mechanical stability, a tungsten ring was gently placed on the ventral side of the ganglion. If crickets generated intense motor activity, the anterior connectives of the prothoracic ganglion were squeezed or cut.

Microelectrodes were pulled from borosilicate glass capillaries (Harvard Apparatus Ltd, UK; 1 mm OD, 0.58 mm ID) using a DMZ-Universal micropipette puller (Zeitz Instruments, Martinsried, Germany), and were filled with 2  $\text{mol l}^{-1}$  potassium acetate, providing resistances of 40–60 M $\Omega$ . For iontophoretic staining, the tips were filled with 0.25% Alexa 568 hydrazide (Invitrogen, Thermo Fisher Scientific, UK) dissolved in water, the shaft was backfilled with 2  $\text{mol l}^{-1}$  KAc, giving a resistance of 80–130 M $\Omega$ . Neurons were recorded in their main dendrites. The position of the microelectrode was controlled by a Leitz micromanipulator (model M, Leica Microsystems, Wetzlar, Germany). Electrode depth was monitored with a digital indicator (ID-C125MB, Mitutoyo Corporation, Japan) attached to the micromanipulator. The major arborisations of the omega neurons were encountered at 150–200  $\mu\text{m}$  below the ventral surface. Intracellular recordings lasted from 10 to 60 min, and signals were amplified by a DC amplifier (BA-01X, NPI Electronic, Tamm, Germany).

All recording channels (intracellular recordings, iontophoretic current, thermocouples, sound) were sampled at 20 kHz using a CED 1401 data acquisition interface (Micro1401 mk II, CED, Cambridge, UK), and saved with a PC for off-line analysis.

Experiments focused on the ON1 and ON2 neurons in the prothoracic ganglion. Fluorescent dyes were iontophoretically injected into the neurons for 5–20 min by a hyperpolarizing current of 1.5–3.0 nA. The tissue was processed using standard histological techniques. ON1 and ON2 morphology was revealed with an epifluorescence microscope (Axiophot, Carl Zeiss, Wetzlar, Germany) and was reconstructed from image stacks (Fig. 1C,D). Neurons were identified according to their morphology and response patterns (Watson and Hardt, 1996; Wohlers and Huber, 1982).

#### Experimental design and data analysis

Neuronal activity was recorded in three different conditions: (1) normal situation with both ears functional; (2) cold inactivation of the contralateral ear; and (3) cold inactivation of the ipsilateral ear. We use the terms ipsilateral and contralateral in respect to the cell body/main dendrite of the recorded ON.

For the auditory responses, we calculated peri-stimulus-time histograms; the latency between the onset of a sound pulse and the

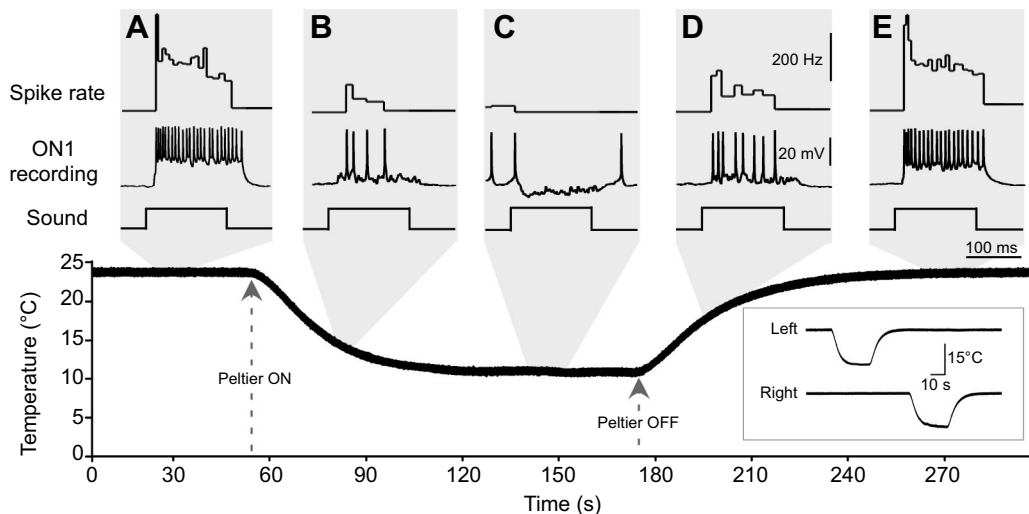

**Fig. 2. ON1 response to sound pulses during cooling and recovery of the ipsilateral hearing organ.** (A) The normal excitatory response of ON1. (B,C) With the Peltier device switched on, the ipsilateral hearing organ is cooled to 10°C within 90 s, excitation to the ON1 neuron is abolished and the contralateral inhibition dominates its response. (D,E) With the Peltier device off, the ON1 excitatory response recovers as the hearing organ reaches room temperature. Sound pulses of 150 ms duration, 75 dB SPL and 4.8 kHz. Inset: any temperature interference between the Peltier devices is beyond the sensitivity of the thermocouples.

first spike of the response; the instantaneous spike rate based on the time interval between subsequent spikes; and the instantaneous spike rate averaged over the set of stimuli. The auditory response showed a phasic onset peak; the duration of the peak was defined as the time from the start of the first spike to the point at which the spike rate declined to 75% of the peak spike rate. The tonic response component was measured over a time window from 60 to 100 ms after the response onset. Recorded data were analysed with NeuroLab software (Knepper and Hedwig, 1997) and Spike 2 (CED). Paired *t*-test and correlation coefficients were used to analyse the differences and correlations between different groups of data. Data are given as means  $\pm$  s.e.m. The number of animals tested is presented as *N* and the number of stimulus repetitions is given as *n*.

## RESULTS

### Evaluating the effectiveness of the cooling system

We tested the effectiveness of the Peltier elements while recording an ON1 neuron intracellularly and simultaneously cooling the ipsilateral ear (Fig. 2). Activating the Peltier element decreased the temperature of the tibia from 24°C (room temperature) to 10°C within 60 s. When the Peltier element was turned off, the tibia recovered to 24°C within 90 s. Before cooling, ON1 responded to a sound pulse of 150 ms/75 dB SPL with a depolarization and approximately 25 spikes (Fig. 2A). With the decrease in temperature, ON1 activity declined. At 90 s in the cooling process with the tibia at 10°C, sound-evoked spike activity was abolished and the inhibition mediated by the contralateral ON1 neuron became obvious (Fig. 2B,C). Spikes occurring in the interval between sound pulses were likely driven by the transiently enhanced activity that the auditory afferents – like other neurons – showed before entering the chill coma (MacMillan and Sinclair, 2011; Overgaard and MacMillan, 2017). These spikes demonstrate that cooling the tibia did not affect the ability of ON1 to generate spikes (Janizewski and Otto, 1989). When the tibia temperature recovered, the response of ON1 reached the initial level again (Fig. 2D,E); before cooling it was  $24.9 \pm 13.4$  action potential (AP) pulse<sup>-1</sup>, and 2 min after cooling it was  $24.9 \pm 12.4$  AP pulse<sup>-1</sup> ( $P=0.99$ ,  $N=14$ ,  $n \geq 100$ ; Fig. 2A,E). Allowing for some variation in animals and experiments, we subsequently set the cooling temperature to 8–10°C to transiently block the activity of each hearing organ.

### Activity of ON1 in normal condition and when one ear is cold-deactivated

Intracellular labelling confirmed the typical shape of ON1 extending over both halves of the prothoracic ganglion with dendrites at the side of the cell body and axonal arborisations at the opposite side (Fig. 1C). When both ears were functional, ON1 responded to 150 ms sound pulses with a salient phaso-tonic spike pattern (Fig. 3A). In the example given, the brief onset peak reached a maximum firing rate of 385.9 Hz and lasted for 10 ms; the firing rate then declined to a tonic level of 116.6 Hz, which was maintained for the rest of the response. ON1 activity, however, was variable in different preparations; the averaged results for all recordings ( $N=6$ ) show an activity pattern with a peak rate of  $268.2 \pm 32.9$  Hz and a tonic rate of  $111.6 \pm 10.8$  Hz (Table 1).

When the contralateral ear was cooled, the reciprocal inhibition was functionally removed as the excitatory afferent input to the contralateral ON1 was abolished. In response to the 150 ms sound pulses, the same ON1 generated a phaso-tonic spike pattern: the phasic peak now lasted for 15 ms and reached a spike rate of 319.6 Hz, while the tonic activity level settled at 149.3 Hz (Fig. 3B). The average peak and tonic activity of all recordings ( $N=6$ ) were  $252.6 \pm 22.5$  and  $142.1 \pm 8.9$  Hz, respectively, and the ON1 tonic activity was now significantly higher than in the normal situation ( $111.6 \pm 10.8$  versus  $142.1 \pm 8.9$  Hz,  $P=0.0025$ ,  $N=6$ ,  $n \geq 100$ ) (Table 1). The peak spike rate, however, was not changed by the contralateral inhibition ( $268.2 \pm 32.9$  versus  $252.6 \pm 22.5$  Hz,  $P=0.1893$ ,  $N=6$ ,  $n \geq 100$ ; Table 1).

The ON1 response substantially changed when we deactivated the ipsilateral auditory organ and abolished its excitatory afferent input. The ON1 activity was now determined by the inhibitory input from its contralateral sibling (Fig. 3C). In the example recording, an initial drop of the membrane potential reached a maximum of  $-9.5$  mV relative to the resting membrane potential. The inhibition then decreased to  $-4.7$  mV and remained at this level for the duration of the stimulus. On average ( $N=6$ ), the initial maximum hyperpolarization mediated by the contralateral input reached  $-6.1 \pm 1.9$  mV (Fig. 3C, arrow) and then declined to a constant level of  $-4.5 \pm 1.8$  mV until the end of the stimulus. When both ears were deactivated, the auditory responses of ON1 were abolished,

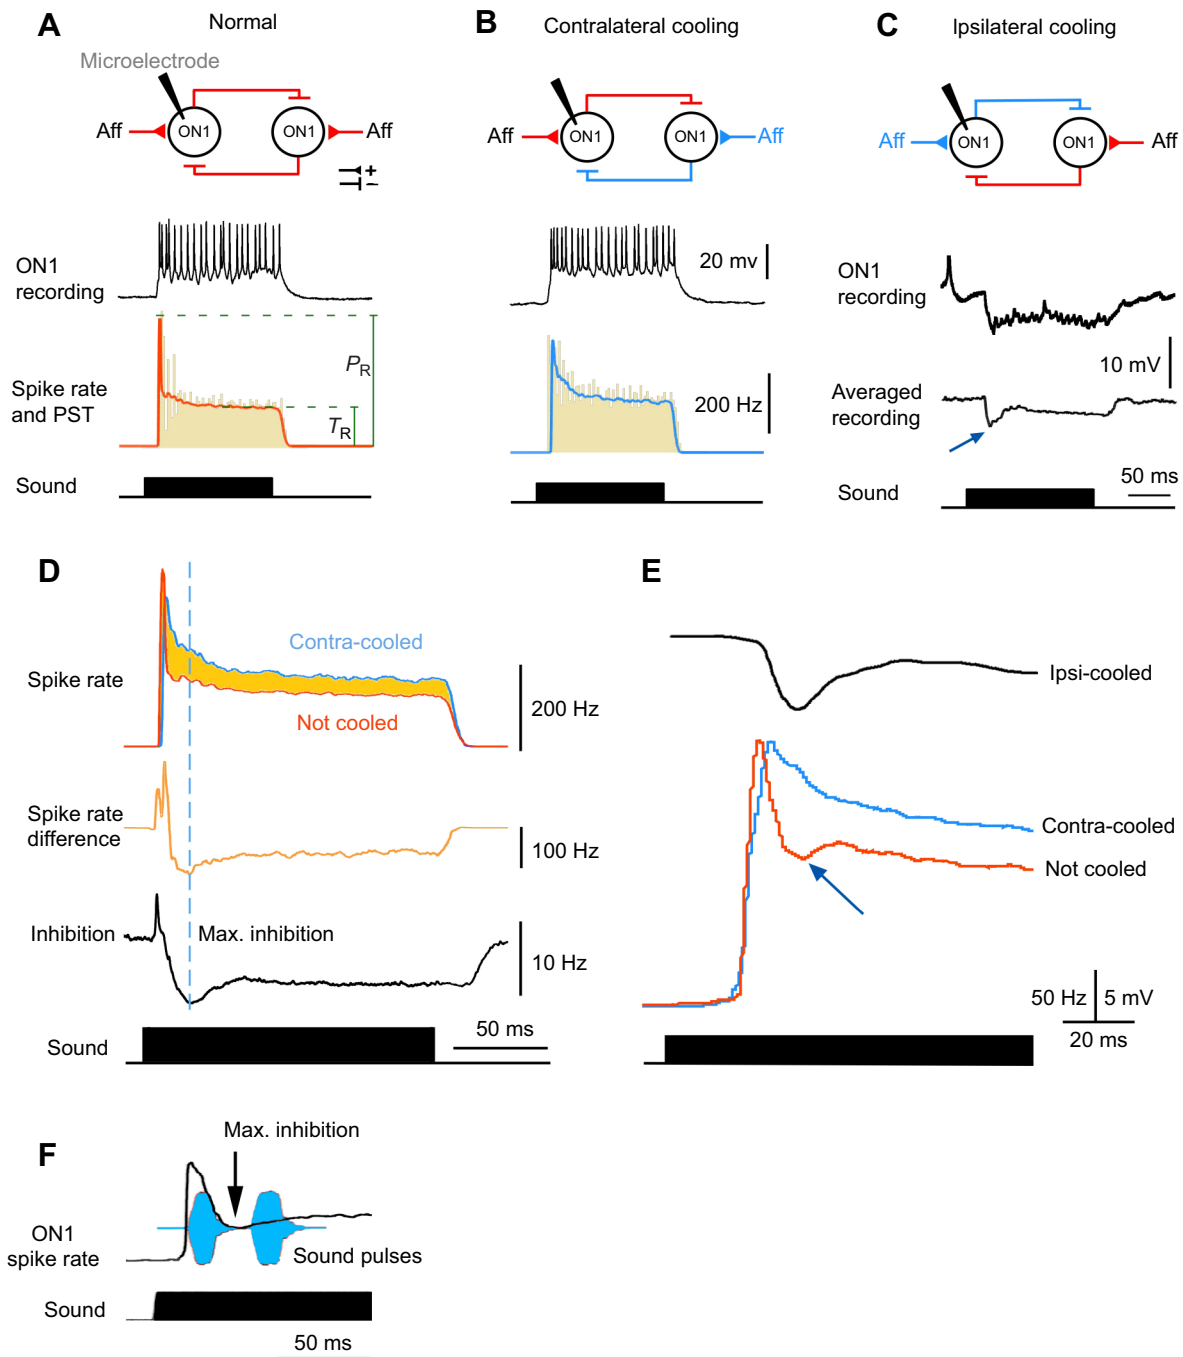

**Fig. 3. ON1 activity in three experimental conditions.** (A) Normal, (B) contralateral ear cooled and (C) ipsilateral ear cooled. Top: layout of active (red) and functionally blocked (blue) ON1 circuitry. Middle: ON1 intracellularly recorded response. Bottom: averaged ON1 instantaneous spike rate (red and blue) and the peri-stimulus-time (PST) histogram (yellow) ( $n=192$ ,  $19 \pm 0.9$  AP pulse $^{-1}$ ;  $n=179$ ,  $24.1 \pm 0.9$  AP pulse $^{-1}$ ), and averaged membrane potential in C.  $P_R$ , phasic spike rate;  $T_R$ , tonic spike rate. (D) Top: averaged ON1 spike rate of recording in A and B under normal (red) and contralateral-cooled (blue) conditions overlaid. Middle: difference in ON1 spike rate between the normal response and the response during contralateral cooling ( $N=14$ ). Bottom: ON1 response to contralateral inhibition when the ipsilateral ear is cooled ( $N=14$ ). (E) Timing of the contralateral inhibition (top, black), the spike rate upon removing the contralateral inhibition (middle, blue) and the spike rate during the normal response (bottom, red). Contralateral inhibition coincides with the fast decline of the onset peak spike rate and the subsequent 'dimple' in the discharge rate. (F) Schematic diagram indicating the ON1 spike rate in response to a tonic pulse and the timing of calling song sound pulses. The reduced ON1 spike rate due to the reciprocal inhibition coincides with the interval between the sound pulses.

indicating that there is no auditory input to these neurons other than from the tibial hearing organs (data not shown).

#### Impact of contralateral inhibition on ON1 activity

Functionally removing the inhibition from the contralateral ON1 allowed us to analyze the dynamic impact of the inhibition. The

contralateral inhibition did not affect the latency of ON1, which was  $18.51 \pm 0.53$  ms in the normal situation and  $19.50 \pm 0.59$  ms when the contralateral ear was cooled ( $P=0.06$ ,  $N=14$ ,  $n \geq 100$ ; Fig. 3A,B, Table 1). Also, the timing of the phasic onset spike rate was not significantly different in both situations, with values of  $21.09 \pm 0.60$  ms for the normal situation and  $22.92 \pm 0.64$  ms for



**Table 1. ON1 activity under normal and contralateral-cooled conditions**

|               | Peak time (ms) | Peak rate (Hz) | Peak duration (ms) | Tonic rate (Hz) | Latency (ms) | Ratio ( $P_R/T_R$ ) |
|---------------|----------------|----------------|--------------------|-----------------|--------------|---------------------|
| Normal        | 20.15±0.9      | 268.2±32.9     | 8.13±1.43          | 111.6±10.8      | 17.414±0.71  | 2.40±0.18           |
| Contra-cooled | 21.46±0.89     | 252.6±22.5     | 18.4±3.47          | 142.1±8.9       | 18.79±0.83   | 1.77±0.08           |
| <i>P</i>      | 0.0547         | 0.1893         | 0.0185             | 0.0025          | 0.1411       | 0.0009              |

contralateral cooled ( $P=0.058$ ,  $N=14$ ,  $n\geq 100$ ; Table 1). The average latency of the contralateral inhibition arriving at the recorded ON1 was  $21.88\pm 0.85$  ms (Table 1) and was approximately  $3.52\pm 0.95$  ms longer than the latency of the excitatory activity. The maximum of the inhibition was reached at  $33.1\pm 1.76$  ms (Table 2).

The impact of the ON1 reciprocal inhibition should be reflected in the spike rate of the auditory response. We overlaid the averaged instantaneous spike rate in response to a 150 ms sound pulse for the normal and the contralateral-cooled situations. Subsequently, we subtracted the normal spike rate from the spike rate obtained during contralateral cooling, demonstrating the effect of the reciprocal inhibition, as shown in Fig. 3D. For 14 recordings, we calculated the spike rate difference, which was maximum with  $107.95\pm 8.20$  Hz after  $32.4\pm 1.70$  ms (Table 2) and then reached a tonic level of  $58.87\pm 0.04$  Hz. The time course of the spike rate difference showed a high similarity with the average time course of the membrane potential change caused by the contralateral inhibition when the ipsilateral ear was cooled (Fig. 3D, bottom). The difference in the spike rate followed the course of the inhibition: both reached a peak at either  $33.10\pm 1.76$  or  $32.4\pm 1.70$  ms (Pearson correlation coefficient,  $r=0.65$ ,  $N=14$ ; Table 1) and then settled at a tonic level.

#### Does reciprocal inhibition contribute to pattern recognition?

For the same recordings, we also analysed whether reciprocal inhibition could make the response to sound pulses of the cricket song more salient. Sound pulses of the calling song are approximately 17–20 ms long and come with a corresponding interpulse interval duration.

Analysing the spike rate dynamics of ON1 neurons under normal conditions revealed that following the phasic onset response, 71% of the 14 neurons exhibited an additional transient decrease in spike rate, which was beyond the expected decrease based on the time course of the decay. This transient decrease formed a pronounced ‘dimple’ in the decaying spike rate (Fig. 3E, arrow), as described by Hedwig (2016). When the inhibitory input was abolished, in experiments when the contralateral ear was cooled, the spike rate of the onset peak decreased more gradually and the dimple was not observed (Fig. 3E, contra-cooled). Recordings when the ipsilateral hearing organ was deactivated show that the contralateral inhibition reached its maximum at  $33.10\pm 1.76$  ms (Fig. 3E, ipsi-cooled), whereas the ‘dimple’ in the spike rate reached its lowest point at  $32.15\pm 0.02$  ms (Pearson correlation coefficient,  $r=0.96$ ,  $N=14$ ; Table 2), indicating that the contralateral inhibition contributes to sharpening the initial phasic onset response of the ON1 neuron. On average, the dimple ends at  $38.92\pm 2.71$  ms (Table 2), thus it would be well timed to reduce or suppress any spike activity in the interpulse intervals of the male calling song. In addition, the

duration of the phasic onset response in normal conditions was significantly shorter than during contralateral cooling ( $8.13\pm 1.42$  versus  $18.4\pm 3.47$  ms,  $P=0.019$ ,  $N=6$ ; Table 1).

We analysed to what degree contralateral inhibition would have an effect on the relative representation of the sound pulses in the spike rates and analysed the ratio of the phasic onset spike rate ( $P_R$ ) to the tonic rate ( $T_R$ ) (Fig. 3A, see  $P_R$  and  $T_R$ ). This was  $2.40\pm 0.18$  in the normal situation, and as the tonic activity increased when the contralateral inhibition was removed, the ratio dropped to  $1.77\pm 0.08$  (Table 1). Thus, for the stimuli tested in normal conditions, contralateral inhibition makes the onset activity significantly more pronounced relative to the tonic part of the response ( $P<0.005$ ,  $N=6$ ).

Taking all ON1 recordings into consideration, the amplitude of the maximum inhibition and the ratio of the phasic/tonic spike rate between normal and contralateral-cooled situations were well correlated (Pearson correlation coefficient,  $r=0.67$ ,  $N=14$ ), implying that a stronger inhibition increases the ratio between the initial peak spike rate and the tonic rate. In the context of song pattern processing, this indicates that reciprocal inhibition sharpens the onset response of ON1 neurons to species-specific sound pulses, and that immediately after the processing of a normal sound pulse it may contribute to reduce the probability of spikes occurring in the inter-pulse intervals, as outlined in Fig. 3F.

#### Activity of ON2 in the normal condition, and when the ipsilateral or contralateral hearing organ is cold-deactivated

ON2 neurons were recorded in the same area as ON1 and their typical structure with broad arborisations connecting both sides of the ganglion was revealed (Fig. 1D).

In the normal situation, the initial peak spike rate of the neuron (Fig. 4) was 337.7 Hz, which declined within 15.5 ms to a tonic level of 167.9 Hz. When averaged across five ON2 neurons, the latency for the first spike was  $19.1\pm 0.5$  ms, and the peak spike rate reached  $308.9\pm 50.6$  Hz. Subsequently, the spike rate settled at a tonic level of  $176.6\pm 27.7$  Hz. The pooled  $P_R/T_R$  ratio of five ON2 neurons recorded in normal and contralateral-cooled conditions was  $1.76\pm 0.14$  and  $1.75\pm 0.16$  ( $P=0.46$ ,  $N=5$ ), respectively.

As the ON2 neurons are not indicated to be coupled by reciprocal inhibition (Wohlers and Huber, 1982), different effects were expected in the cooling experiments. In the contralateral-cooled condition, the example ON2 showed a similar response as in the normal situation (Fig. 4B). It generated a phasic onset spike rate of 322.0 Hz, which then declined to a tonic level of 179.5 Hz. When averaged over five ON2 recordings, the spike latency was  $20.4\pm 1.2$  ms. The peak onset activity was  $284.4\pm 70.2$  Hz; it occurred after  $23.4\pm 1.5$  ms and then decreased to a tonic level of  $169.2\pm 42.3$  Hz. Average spike latency in the normal and contralateral-cooled experiments was  $19.1\pm 0.5$  and  $20.4\pm 1.2$  ms, respectively, and these values were not significantly different ( $P=0.24$ ,  $N=5$ ); also the peak spike rates in the normal and contralateral-cooled situations were not significantly different ( $P=0.44$ ,  $N=5$ ). The inactivation of the ipsilateral ear led to reduced depolarization and a reduction in spike rate by  $87.56\pm 1.52\%$  in response to the acoustic stimulus as it received an excitatory synaptic input from the contralateral ear (Fig. 4C). The pooled  $P_R/T_R$  ratio for normal and contralateral-

**Table 2. Time course of the contralateral inhibition and the ‘dimple’**

| Inhibition starts (ms) | Max. inhibition (ms) | Max. difference in ON1 spike rate between normal and contra-cooled response (ms) | Max. dimple of spike rate (ms) |
|------------------------|----------------------|----------------------------------------------------------------------------------|--------------------------------|
| 21.99±1.73             | 33.10±1.76           | 32.4±1.70                                                                        | 32.15±0.02                     |

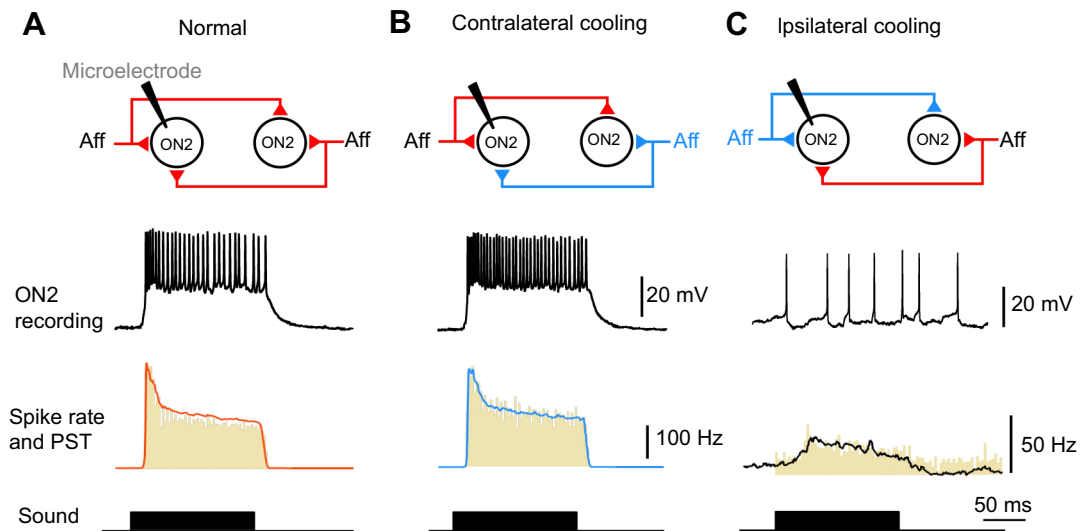

**Fig. 4. ON2 activity in three experimental conditions.** (A) Normal, (B) contralateral ear cooled and (C) ipsilateral ear cooled. Top: layout of active (red) and functionally blocked by cooling (blue) ON2 circuitry. Middle: ON2 intracellular recorded response. Bottom: averaged ON2 instantaneous spike rate overlaid on PST histogram (yellow) (A:  $n=432$ ,  $28.5 \pm 1.0$  AP pulse $^{-1}$ ; B:  $n=91$ ,  $35.2 \pm 0.7$  AP pulse $^{-1}$ ; C:  $n=159$ ,  $3.7 \pm 2.4$  AP pulse $^{-1}$ ).

cooled experiments are  $1.76 \pm 0.14$  and  $1.75 \pm 0.16$ , respectively ( $P=0.46$ ,  $N=5$ ). The experiments show an asymmetry between the bilateral excitatory auditory inputs, with the ipsilateral input dominating ON2's response. We did not pursue any further experimental analysis of the contralateral activation, but in none of the recordings did we observe an inhibitory input to ON2.

## DISCUSSION

Our experimental approach allowed us to selectively cool and deactivate one cricket hearing organ, without affecting the temperature of the opposite ear, within the thermocouple sensitivity. The excitatory ON1 auditory response failed when the ipsilateral foretibia was cooled to  $10^\circ\text{C}$ , demonstrating that low temperature abolishes activity of the auditory afferents. Our results are in line with those of French and Kuster (1982) and French (1985), giving a critical temperature of less than  $10^\circ\text{C}$  for the deactivation of cockroach mechanosensory neurons, and Baden and Hedwig (2010), reporting a  $4^\circ\text{C}$  surface temperature of the Peltier device to block the afferents in a considerably larger bush-cricket. We speculate that for the cricket auditory afferents, the cold-block temperature was between the critical thermal minimum temperature and their chill-coma temperature, which in insects abolishes transduction and spike activity. The functional consequences of the cold-block may be linked to decreased membrane fluidity and/or altered ion channel kinetics, which are reversible (Overgaard and MacMillan, 2017). Temperature could also affect the vibrations of the tympanic membrane; however, in locusts, a temperature shift from  $21$  to  $28^\circ\text{C}$  had only a minor effect (Eberhard et al., 2014). Reducing the temperature of an insect appendage by Peltier elements is an effective approach to reversibly block inputs from peripheral sensory organs in order to analyse central neural processing. The method is suitable to block sensory afferents of insect appendages without surgical interference and should be versatile to study, for example, mechanoreceptive feedback involved in walking or jumping in larger insects (Burrows, 1996).

### Does reciprocal inhibition in ON1 contribute to auditory contrast enhancement and temporal filtering?

As the cold-deactivation of the auditory afferents was reversible, we could analyse in continuous intracellular recordings the function of

bilateral auditory processing in ON neurons. For ON2, our experiments confirmed bilateral excitatory auditory inputs. The ipsilateral input dominated the neuron's response, which corresponds to the distribution of input synapses as 90% of the inputs occur on ipsilateral branches (Watson and Hardt, 1996). However, the bilateral response pattern is different to previous recordings (Wohlers and Huber, 1982), which show a slightly stronger depolarization upon ipsilateral stimulation but an identical spiking response for stimulation from either side. Even if the contralateral excitatory input to ON2 is weak, integrating activity from both hearing organs will enhance the overall reliability of ON2 responses to acoustic stimuli, which may be forwarded to local motor networks. Synaptic connections of ON2, however, have not yet been described.

For ON1 neurons, we demonstrated that the time course of the contralateral inhibition matched the difference in spike rate with and without the inhibitory input. Contralateral inhibition had a significant impact on the tonic ON1 response, and this is in line with the presumed function of ON1 neurons to enhance the bilateral auditory contrast (Wohlers and Huber, 1978, 1982; Kleindienst et al., 1981; Wiese and Eilts, 1985). Reciprocal inhibition, however, did not alter the response latency, as also reported by Kleindienst et al. (1981). This may seem surprising as it would indicate that contrast enhancement – at least at the level of the ON1 neurons – would not be effective at the level of bilateral spike timing. However, it has to be considered that we used a frontal speaker with both hearing organs receiving a highly similar or identical input.

The ON1 results further demonstrate that reciprocal inhibition can contribute to the temporal filtering of the calling song pattern by sharpening the phasic onset response (Hedwig, 2016). With contralateral inhibition, a more pronounced decrease of the phasic response occurred as compared with a more gradual decrease when contralateral inhibition was blocked (Fig. 3C). A similar effect occurs in the homologous pair of omega neurons in a bush-cricket after pharmacological blocking of contralateral inhibition (Fig. 4 in Molina and Stumpner, 2005). Also, a  $\text{Ca}^{2+}$ -triggered potassium outward current (Baden and Hedwig, 2009; Sobel and Tank, 1994) could contribute to the rapid decrease of the onset spike activity. Contralateral inhibition, however, plays the dominant role as the pronounced decline in spike rate was not observed when the contralateral ear was cold-deactivated.

The higher  $P_R/T_R$  ratio of the auditory response with contralateral inhibition also indicates that the inhibition enhanced the coding of the onset of a sound pulse relative to the tonic response level. A salient onset response of ON1 will increase the signal-to-noise ratio and may reflect an adaptation of the cricket's afferent auditory pathway to efficiently copy the species-specific sound pattern (Nabatiyan et al., 2003; Hedwig, 2016). The effect of contralateral inhibition in shaping the ON1 response will be strongest in a frontal stimulus situation, when both hearing organs are activated to the same extent, supporting Marsat and Pollack's (2004) suggestion of a direction-sensitive attention mechanism.

Under the impact of contralateral inhibition in 71% of animals, a decrease of the spike rate occurred, forming a relative minimum, a 'dimple' immediately after the phasic onset activity. This dimple coincided with the maximum of the contralateral inhibition (Fig. 3E); the time when the contralateral inhibition reached its maximum ( $33.10 \pm 1.76$  ms) matched the time when the spike rate transiently decreased to a local minimum ( $32.15 \pm 0.02$  ms;  $r = -0.96$ ). As this time interval matches the interval between the sound pulses of the calling song, contralateral inhibition enhances the onset coding of sound pulses and can contribute to reduce spike activity in the pulse intervals of natural chirps, as indicated in Fig. 3F (Hedwig, 2016). Very similar effects are reported for a computational network of cricket auditory neurons in which the introduction of ON1-like reciprocal inhibition enhances the onset encoding of sound pulses and improves the encoding of the sound pattern (Reeve and Webb, 2003). Reciprocal inhibition of the ON1 neurons was also suggested as a temporal filter for the song pattern (Wiese and Eilts, 1985). Based on our data, it may support the processing of sound pulses, but its effect is not sufficient as a mechanism for deciphering the temporal pulse pattern at the thoracic level.

#### Acknowledgements

We are most grateful for the very constructive comments of our referees, and we thank G. Harrison and S. Ellis for excellent technical support.

#### Competing interests

The authors declare no competing or financial interests.

#### Author contributions

Conceptualization: X.Z., B.H.; Methodology: X.Z., B.H.; Formal analysis: X.Z.; Investigation: X.Z.; Writing - original draft: X.Z.; Writing - review & editing: X.Z., B.H.; Supervision: B.H.; Project administration: B.H.

#### Funding

The Biotechnology and Biological Sciences Research Council provided the equipment for this study.

#### References

- Baden, T. and Hedwig, B.** (2009). Dynamics of free intracellular  $Ca^{2+}$  during synaptic and spike activity of cricket tibial motoneurons. *Europ. J. Neurosci.* **29**, 1357-1368. doi:10.1111/j.1460-9568.2009.06694.x
- Baden, T. and Hedwig, B.** (2010). Primary afferent depolarisation and frequency processing in auditory afferents. *J. Neurosci.* **30**, 14862-14869. doi:10.1523/JNEUROSCI.2734-10.2010
- Burrows, M.** (1996). *The Neurobiology of an Insect Brain. Chapter 8: Walking; Chapter 9: Jumping.* Oxford University Press.
- Eberhard, M. JB., Gordon, S. D., Windmill, J. FC. and Ronacher, B.** (2014). Temperature effects on the tympanal membrane and auditory receptor neurons in the locust. *J. Comp. Physiol. A* **200**, 837-847. doi:10.1007/s00359-014-0926-y
- Esch, H., Huber, F. and Wohlers, D. W.** (1980). Primary auditory neurons in crickets: physiology and central projections. *J. Comp. Physiol. A* **137**, 27-38. doi:10.1007/BF00656914
- Farley, R. D., Case, J. F. and Roeder, K. D.** (1967). Pacemaker for tracheal ventilation in the cockroach, *Periplaneta americana* (L.). *J. Insect Physiol.* **13**, 1713-1728. doi:10.1016/0022-1910(67)90166-7
- French, A. S.** (1985). The effects of temperature on action potential encoding in the cockroach tactile spine. *J. Comp. Physiol. A* **156**, 817-821. doi:10.1007/BF00610833
- French, A. S. and Kuster, J. E.** (1982). The Effects of Temperature on Mechanotransduction in the Cockroach Tactile Spine. *J. Comp. Physiol. A* **147**, 251-258.
- Hedwig, B.** (2016). Sequential filtering processes shape feature detection in crickets: a framework for song pattern recognition. *Front. Physiol.* **7**, 46. doi:10.3389/fphys.2016.00046
- Hedwig, B. and Stumpner, A.** (2016). Central neural processing of sound signals in insects. In *Springer Handbook of Auditory Research: Insect Hearing, Chapter 8* (ed. G. S. Pollack, A. C. Mason, A. Popper and R. F. Fay), pp. 177-214. Springer
- Horseman, G. and Huber, F.** (1994a). Sound localisation in crickets - I. Contralateral inhibition of an ascending auditory interneuron (AN1) in the cricket *Gryllus bimaculatus*. *J. Comp. Physiol. A* **175**, 389-398. doi:10.1007/BF00199247
- Horseman, G. and Huber, F.** (1994b). Sound localisation in crickets - II. Modelling the role of a simple neural network in the prothoracic ganglion. *J. Comp. Physiol. A* **175**, 399-413. doi:10.1007/BF00199248
- Janiszewski, J. and Otto, D.** (1989). Responses and song pattern copying of Omega-type I-neurons in the cricket, *Gryllus bimaculatus*, at different prothoracic temperatures. *J. Comp. Physiol. A* **164**, 443-450. doi:10.1007/BF00610438
- Kleindienst, H.-U., Koch, U. T. and Wohlers, D. W.** (1981). Analysis of the cricket auditory system by acoustic stimulation using a closed sound field. *J. Comp. Physiol. A* **141**, 283-296. doi:10.1007/BF00609930
- Knepper, M. and Hedwig, B.** (1997). NEUROLAB, a PC-program for the processing of neurobiological data. *Comp. Meth. Prog. Biomed.* **52**, 75-77. doi:10.1016/S0169-2607(96)01781-6
- Lewis, B.** (1983). Directional cues for auditory localization. In: *Bioacoustics. A comparative approach* (ed. B. Lewis), pp. 233-257. London, Academic Press.
- MacMillan, H. A. and Sinclair, B. J.** (2011). Mechanisms underlying insect chill-coma. *J. Insect Physiol.* **57**, 12-20. doi:10.1016/j.jinsphys.2010.10.004
- Marsat, G. and Pollack, G. S.** (2004). Differential temporal coding of rhythmically diverse acoustic signals by a single interneuron. *J. Neurophysiol.* **92**, 939-948. doi:10.1152/jn.00111.2004
- Matthews, P. G. and White, C. R.** (2013). Reversible brain inactivation induces discontinuous gas exchange in cockroaches. *J. Exp. Biol.* **16**, 2012-2016. doi:10.1242/jeb.077479
- Michelsen, A., Popov, A. V. and Lewis, B.** (1994). Physics of directional hearing in the cricket *Gryllus bimaculatus*. *J. Comp. Physiol. A* **175**, 153-164. doi:10.1007/BF00215111
- Molina, J. and Stumpner, A.** (2005). Effects of pharmacological treatment and photoinactivation on the directional responses of an insect neuron. *J. Exp. Zool.* **303A**, 1085-1103. doi:10.1002/jez.a.228
- Nabatiyan, A., Poulet, J. FA., de Polavieja, G. G. and Hedwig, B.** (2003). Temporal pattern recognition based on instantaneous spike rate coding in a simple auditory system. *J. Neurophysiol.* **90**, 2484-2493. doi:10.1152/jn.00259.2003
- Overgaard, J. and MacMillan, H. A.** (2017). The integrative physiology of insect chill tolerance. *Ann. Rev. Physiol.* **79**, 187-208. doi:10.1146/annurev-physiol-022516-034142
- Popov, A. V., Markovich, A. M. and Andjan, A. S.** (1978). Auditory interneurons in the prothoracic ganglion of the cricket, *Gryllus bimaculatus* deGeer - I. The large segmental auditory neuron (LSAN). *J. Comp. Physiol. A* **126**, 183-192. doi:10.1007/BF00666372
- Reeve, R. E. and Webb, B. H.** (2003). New neural circuits for robot phonotaxis. *Phil. Trans. R. Soc. Lond. A* **361**, 2245-2266. doi:10.1098/rsta.2003.1274
- Schmidt, A. K. and Römer, H.** (2013). Diversity of acoustic tracheal system and its role for directional hearing in crickets. *Front. Zool.* **10**, 61. doi:10.1186/1742-9994-10-61
- Selverston, A. I., Kleindienst, H. U. and Huber, F.** (1985). Synaptic connectivity between cricket auditory interneurons as studied by selective photoinactivation. *J. Neurosci.* **5**, 1283-1292. doi:10.1523/JNEUROSCI.05-05-01283.1985
- Sobel, E. C. and Tank, D. W.** (1994). In vivo  $Ca^{2+}$  dynamics in a cricket auditory neuron: an example of chemical computation. *Science* **263**, 823-826. doi:10.1126/science.263.5148.823
- Watson, A. H. D. and Hardt, M.** (1996). Distribution of synapses on two local auditory interneurons, ON1 and ON2, in the prothoracic ganglion of the cricket: relationships with GABA-immunoreactive neurones. *Cell Tissue Res.* **283**, 231-246. doi:10.1007/s004410050534
- Wiese, K. and Eilts, K.** (1985). Evidence for matched frequency dependence of bilateral inhibition in the auditory pathway of *Gryllus bimaculatus*. *Zool. Jahrb. Physiol.* **89**, 181-201.
- Wiese, K. and Eilts-Grimm, K.** (1985). Functional potential of recurrent lateral inhibition in cricket audition. In *Acoustic and Vibrational Communication in Insects* (ed. K. Kalmring and N. Elsner), pp. 33-40. Berlin: Hamburg Parey.
- Wohlers, D. W. and Huber, F.** (1978). Intracellular recording and staining of cricket auditory interneurons (*Gryllus campestris* L., *Gryllus bimaculatus* DeGeer). *J. Comp. Physiol. A* **127**, 11-28. doi:10.1007/BF00611922
- Wohlers, D. W. and Huber, F.** (1982). Processing of sound signals by six types of neurons in the prothoracic ganglion of the cricket, *Gryllus campestris* L. *J. Comp. Physiol. A* **146**, 161-173. doi:10.1007/BF00610234
